# Supplementary material for: In vitro feasibility of bovine and canine whole blood and commercially prepared canine packed red blood cells as a source of xenotransfusion in swine (Sus scrofa domestica)
Source: PeerJ. 2025 May 9;13:e19436. doi: 10.7717/peerj.19436 (PMC12068249; doi:10.7717/peerj.19436)
Supplement: Supplemental Information 1 [file peerj-13-19436-s001.xlsx]

## Sheet: appendix of bovine results
Test #	Commercial Pig 9	CM type	Standard Saline Tube		Slide Method		Test #	Commercial Pig 5	CM type	Standard Saline Tube		Slide Method			Auto Controls: Recipient plasma (QS) or serum (SSA) and pRBC (QS) and washed RBC (SSA)
	Type 0		Hemolysis	Agglutination	Agglutination			Type A		Hemolysis	Agglutination	Agglutination			Test #	Commercial Pig #	Blood Type	Standard Saline Tube		Slide Method
25	BPA	Major	0	2+	1+		57	BPA	Major	0	0	0						Hemolysis	Agglutination	Agglutination
		Minor	0	4+	4+				Minor	0	4+	4+			25	9	0	0	1+	1+
26	BPB	Major	0	0	0		58	BPB	Major	0	0	0			33	2	0	0	0	1+
		Minor	0	4+	4+				Minor	0	4+	4+			41	3	A	0	0	0
27	BPC	Major	0	0	0		59	BPC	Major	0	0	0			49	4	A	0	0	1+
		Minor	0	4+	4+				Minor	0	4+	4+			57	5	A	0	0	0
28	BPD	Major	0	0	2+		60	BPD	Major	0	0	0			65	6	A	0	0	0
		Minor	0	4+	4+				Minor	0	4+	4+			73	7	0	0	1+	1+
29	BPE	Major	0	2+	2+		61	BPE	Major	0	0	0			81	8	0	0	0	1+
		Minor	0	4+	4+				Minor	0	4+	4+
30	BPF	Major	0	0	0		62	BPF	Major	0	0	0
		Minor	0	4+	4+				Minor	0	4+	4+
31	BPG	Major	0	2+	2+		63	BPG	Major	0	0	0
		Minor	0	4+	4+				Minor	0	4+	4+
32	BPH	Major	0	0	0		64	BPH	Major	0	0	0
		Minor	0	4+	4+				Minor	0	4+	4+
Test #	Commercial Pig 2	CM type	Standard Saline Tube		Slide Method		Test #	Commercial Pig 6	CM type	Standard Saline Tube		Slide Method
	Type 0		Hemolysis	Agglutination	Agglutination			Type A		Hemolysis	Agglutination	Agglutination
33	BPA	Major	0	0	0		65	BPA	Major	0	0	0
		Minor	0	4+	1+				Minor	0	4+	4+
34	BPB	Major	0	0	0		66	BPB	Major	0	0	0
		Minor	0	4+	1+				Minor	0	4+	4+
35	BPC	Major	0	0	0		67	BPC	Major	0	0	0
		Minor	0	3+	2+				Minor	0	4+	4+
36	BPD	Major	0	0	0		68	BPD	Major	0	0	0
		Minor	0	3+	2+				Minor	0	4+	4+
37	BPE	Major	0	1+	0		69	BPE	Major	0	0	0
		Minor	0	4+	1+				Minor	0	4+	4+
38	BPF	Major	0	0	0		70	BPF	Major	0	0	0
		Minor	0	3+	2+				Minor	0	4+	4+
39	BPG	Major	0	2+	0		71	BPG	Major	0	0	0
		Minor	0	4+	0				Minor	0	4+	4+
40	BPH	Major	0	2+	0		72	BPH	Major	0	0	0
		Minor	0	4+	1+				Minor	0	4+	4+
Test #	Commercial Pig 3	CM type	Standard Saline Tube		Slide Method		Test #	Commercial Pig 7	CM type	Standard Saline Tube		Slide Method
	Type A		Hemolysis	Agglutination	Agglutination			Type 0		Hemolysis	Agglutination	Agglutination
41	BPA	Major	0	0	0		73	BPA	Major	0	0	0
		Minor	0	4+	4+				Minor	0	4+	4+
42	BPB	Major	0	0	0		74	BPB	Major	0	0	0
		Minor	0	4+	4+				Minor	0	4+	4+
43	BPC	Major	0	0	0		75	BPC	Major	0	0	0
		Minor	0	4+	4+				Minor	0	4+	4+
44	BPD	Major	0	0	0		76	BPD	Major	0	0	0
		Minor	0	4+	4+				Minor	0	4+	4+
45	BPE	Major	0	0	0		77	BPE	Major	0	0	0
		Minor	0	4+	4+				Minor	0	4+	4+
46	BPF	Major	0	0	0		78	BPF	Major	0	0	0
		Minor	0	4+	4+				Minor	0	4+	4+
47	BPG	Major	0	0	1+		79	BPG	Major	0	0	0
		Minor	0	4+	4+				Minor	0	4+	4+
48	BPH	Major	0	0	0		80	BPH	Major	0	0	0
		Minor	0	4+	4+				Minor	0	4+	4+
Test #	Commercial Pig 4	CM type	Standard Saline Tube		Slide Method		Test #	Commercial Pig 8	CM type	Standard Saline Tube		Slide Method
	Type A		Hemolysis	Agglutination	Agglutination			Type 0		Hemolysis	Agglutination	Agglutination
49	BPA	Major	0	0	0		81	BPA	Major	0	0	0
		Minor	0	4+	4+				Minor	0	4+	4+
50	BPB	Major	0	0	0		82	BPB	Major	0	0	0
		Minor	0	4+	4+				Minor	0	4+	4+
51	BPC	Major	0	0	0		83	BPC	Major	0	0	0
		Minor	0	4+	4+				Minor	0	4+	4+
52	BPD	Major	0	0	0		84	BPD	Major	0	0	0
		Minor	0	4+	4+				Minor	0	4+	4+
53	BPE	Major	0	0	0		85	BPE	Major	0	0	0
		Minor	0	4+	4+				Minor	0	4+	4+
54	BPF	Major	0	0	0		86	BPF	Major	0	0	2+
		Minor	0	4+	4+				Minor	0	4+	4+
55	BPG	Major	0	0	0		87	BPG	Major	0	0	0
		Minor	0	4+	4+				Minor	0	4+	4+
56	BPH	Major	0	0	0		88	BPH	Major	0	0	0
		Minor	0	4+	4+				Minor	0	4+	4+

## Sheet: appendix of canine results
Test #	Companion Pig 1	CM Type	Standard Saline Tube		Slide Method		Test #	Companion Pig 5	CM Type	Standard Saline Tube		Slide Method			Auto Controls: Recipient plasma (QS) or serum (SSA) and pRBC (QS) and washed RBC (SSA)
	Type A		Hemolysis	Agglutination	Agglutination			Type 0		Hemolysis	Agglutination	Agglutination			Test #	Companion Pig #	Blood Type	Standard Saline Tube		Slide Method
89	Whole blood donor 1	Major	2+	0 cells	4+		101	Whole blood donor 1	Major	2+	No cells	4+						Hemolysis	Agglutination	Agglutination
		Minor	2+	0 cells	4+				Minor	1+	Little to no cells	4+			89	1	A	0	1+	0
90	Whole blood donor 2	Major	2+	0 cells	4+		102	Whole blood donor 2	Major	1+	No cells	4+			92	2	0	0	0	0
		Minor	2+	0 cells	4+				Minor	1+	No cells	4+			95	3	A	0	0	1+
91	Whole blood donor 3	Major	1+	0 cells	4+		103	Whole blood donor 3	Major	1+	No cells	4+			98	4	A	0	1+	1+
		Minor	2+	0 cells	4+				Minor	1+	No cells	4+			101	5	0	0	0	0
113	pRBC DEA N 1	Major	1+	0 cells	4+		125	pRBC DEA N 1	Major	1+	No cells	4+			104	6	0	0	0	0
		Minor	0	4+	0				Minor	0	4+	1+			107	7	A	0	1+	1+
114	pRBC DEA N 2	Major	2+	3+	4+		126	pRBC DEA N 2	Major	1+	No cells	4+
		Minor	0	4+	1+				Minor	0	4+	0			*degree of agglutination was unable to be fully evaluated due to the high degree of hemolysis
115	pRBC DEA N 3	Major	1+	3+	4+		127	pRBC DEA N 3	Major	1+	No cells	4+
		Minor	1+	Little to no cells	1+				Minor	1+	No cells	1+
137	pRBC DEA P 1	Major	1+	3+	4+		149	pRBC DEA P 1	Major	1+	No cells	4+
		Minor	1+	Little to no cells	1+				Minor	1+	No cells	2+
138	pRBC DEA P 2	Major	2+	Little to no cells	4+		150	pRBC DEA P 2	Major	1+	No cells	4+
		Minor	1+	No cells	0				Minor	0	No cells	4+
139	pRBC DEA P 3	Major	1+	3+	4+		151	pRBC DEA P 3	Major	1+	No cells	4+
		Minor	1+	No cells	0				Minor	0	No cells	0
Test #	Companion Pig 2	CM Type	Standard Saline Tube		Slide Method		Test #	Companion Pig 6	CM Type	Standard Saline Tube		Slide Method
	Type 0		Hemolysis	Agglutination	Agglutination			Type 0		Hemolysis	Agglutination	Agglutination
92	Whole blood donor 1	Major	2+	4+	4+		104	Whole blood donor 1	Major	2+	No cells	4+
		Minor	2+	4+	4+				Minor	2+	No cells	4+
93	Whole blood donor 2	Major	2+	4+	4+		105	Whole blood donor 2	Major	2+	No cells	4+
		Minor	2+	4+	4+				Minor	1+	2+	4+
94	Whole blood donor 3	Major	2+	4+	4+		106	Whole blood donor 3	Major	2+	2+	4+
		Minor	1+	No cells	4+				Minor	2+	No cells	4+
116	pRBC DEA N 1	Major	2+	2+	4+		128	pRBC DEA N 1	Major	1+	No cells	4+
		Minor	1+	4+	0+				Minor	1+	4+	0
117	pRBC DEA N 2	Major	1+	2+	4+		129	pRBC DEA N 2	Major	1+	4+	4+
		Minor	1+	4+	0+				Minor	1+	4+	2+
118	pRBC DEA N 3	Major	1+	2+	4+		130	pRBC DEA N 3	Major	1+	No cells	4+
		Minor	1+	4+	1+				Minor	1+	4+	0
140	pRBC DEA P 1	Major	1+	Little to no cells	4+		152	pRBC DEA P 1	Major	1+	No cells	4+
		Minor	1+	No cells	0				Minor	1+	No cells	0
141	pRBC DEA P 2	Major	1+	Little to no cells	4+		153	pRBC DEA P 2	Major	1+	No cells	4+
		Minor	1+	No cells	0				Minor	1+	4+	1+
142	pRBC DEA P 3	Major	1+	2+	4+		154	pRBC DEA P 3	Major	1+	No cells	4+
		Minor	1+	No cells	0				Minor	1+	4+	1+
Test #	Companion Pig 3	CM Type	Standard Saline Tube		Slide Method		Test #	Companion Pig 7	CM Type	Standard Saline Tube		Slide Method
	Type A		Hemolysis	Agglutination	Agglutination			Type A		Hemolysis	Agglutination	Agglutination
95	Whole blood donor 1	Major	2+	2+	4+		107	Whole blood donor 1	Major	2+	No cells	4+
		Minor	1+	Little to no cells	4+				Minor	2+	No cells	4+
96	Whole blood donor 2	Major	1+	Little to no cells	4+		108	Whole blood donor 2	Major	1+	No cells	4+
		Minor	1+	Little to no cells	4+				Minor	1+	3+	4+
97	Whole blood donor 3	Major	1+	4+	4+		109	Whole blood donor 3	Major	2+	No cells	4+
		Minor	2+	Little to no cells	4+				Minor	1+	3+	4+
119	pRBC DEA N 1	Major	0	2+	4+		131	pRBC DEA N 1	Major	1+	3+	4+
		Minor	1+	4+	1+				Minor	1+	4+	0
120	pRBC DEA N 2	Major	1+	1+	4+		132	pRBC DEA N 2	Major	2+	No cells	4+
		Minor	1+	4+	0				Minor	0	4+	0
121	pRBC DEA N 3	Major	1+	2+	4+		133	pRBC DEA N 3	Major	1+	3+	4+
		Minor	1+	No cells	0				Minor	1+	4+	1+
143	pRBC DEA P 1	Major	1+	No cells	4+		155	pRBC DEA P 1	Major	2+	4+	4+
		Minor	1+	No cells	1+				Minor	1+	No cells	1+
144	pRBC DEA P 2	Major	1+	No cells	4+		156	pRBC DEA P 2	Major	2+	4+	4+
		Minor	1+	No cells	0				Minor	1+	Little to no cells	0
145	pRBC DEA P 3	Major	1+	4+	4+		157	pRBC DEA P 3	Major	2+	No cells	4+
		Minor	1+	4+	1+				Minor	1+	Little to no cells	0
Test #	Companion Pig 4	CM Type	Standard Saline Tube		Slide Method
	Type A		Hemolysis	Agglutination	Agglutination
98	Whole blood donor 1	Major	2+	No cells	4+
		Minor	1+	No cells	4+
99	Whole blood donor 2	Major	2+	No cells	4+
		Minor	1+	No cells	4+
100	Whole blood donor 3	Major	2+	No cells	4+
		Minor	1+	4+	4+
122	pRBC DEA N 1	Major	2+	No cells	4+
		Minor	0	4+	0
123	pRBC DEA N 2	Major	1+	4+	4+
		Minor	0	2+	1+
124	pRBC DEA N 3	Major	2+	3+	4+
		Minor	0	No cells	1+
146	pRBC DEA P 1	Major	1+	No cells	4+
		Minor	0	No cells	1+
147	pRBC DEA P 2	Major	1+	No cells	4+
		Minor	0	No cells	4+
148	pRBC DEA P 3	Major	1+	3+	4+
		Minor	0	No cells	2+
